# Supplementary material for: Structural mechanisms of phospholipid activation of the human TPC2 channel
Source: eLife journal article supplement (doi:10.7554/elife.45222), 2019-03-12
Supplement: supp [file elife-45222-supp-v1.zip]

### Source Data for Figure 4A

[ $I/I_{\text{Max}}$  measured at -100 mV with various PI(3,5)P2 concentrations, where  $I_{\text{Max}}$  is the current at 30uM PI(3,5)P2 .]

| 3,5-PIP2 in uM | #1     | #2     | #3     | #4     | #5     | Mean   | SEM    |
|----------------|--------|--------|--------|--------|--------|--------|--------|
| 0.03           | 0.0124 | 0.0063 | 0.0300 | 0.0300 | 0.0135 | 0.0184 | 0.0049 |
| 0.1            | 0.0592 | 0.0627 | 0.1943 | 0.1800 | 0.0767 | 0.1146 | 0.0299 |
| 1              | 0.7262 | 0.7114 | 0.6986 | 0.7057 | 0.8819 | 0.7448 | 0.0346 |
| 10             | 0.9199 | 0.9227 | 0.9314 | 0.9743 | 0.9577 | 0.9412 | 0.0106 |
| 30             | 1      | 1      | 1      | 1      | 1      | 1      | 0      |

### Source Data for Figure 4B

[Normalized currents of HsTPC2 measured at -100 mV with various phosphatidylinositol lipids at 10  $\mu$ M.]

|          | #1     | #2     | #3     | #4     | #5     | #6     | Mean   | SEM    |
|----------|--------|--------|--------|--------|--------|--------|--------|--------|
| 3,5-PIP2 | 1      | 1      | 1      | 1      | 1      | 1      | 1      | 0      |
| 4,5-PIP2 | 0.0603 | 0.0691 | 0.1053 | 0.0333 | 0.0337 | 0.0100 | 0.0520 | 0.0150 |
| 3,4-PIP2 | 0.0171 | 0.0306 | 0.0147 | 0.0269 | 0.0274 | 0.0083 | 0.0209 | 0.0039 |
| 5-PIP2   | 0.0207 | 0.0309 | 0.0368 | 0.03   | 0.0141 | 0.0130 | 0.0243 | 0.0044 |
| 3-PIP2   | 0.0362 | 0.037  | 0.0408 | 0.0166 | 0.0234 | 0.0337 | 0.0313 | 0.0042 |

Source Data for Figure 4E  
[Current density (pA/pF) at -100 mV]

|      | TPC2 (WT) | K203A | K204A | K207A | S322A | R329A |
|------|-----------|-------|-------|-------|-------|-------|
| #1   | 132.4     | 9.8   | 12.6  | 123.5 | 54.1  | 18.2  |
| #2   | 315.8     | 20.6  | 18.2  | 63.2  | 65.4  | 15.6  |
| #3   | 253.6     | 11.8  | 8.9   | 78.6  | 120.6 | 21.2  |
| #4   | 180.8     | 31.7  | 7.9   | 45.6  | 140.8 | 19.8  |
| #5   | 156.2     | 13.6  | 12.8  | 60.2  | 154.4 | 32.6  |
| #6   | 276.3     | 35.6  | 15.6  | 50.4  | 45.3  | 35.7  |
| #7   | 217.9     | 15.6  | 14.8  | 110.5 |       | 27.8  |
| #8   | 364.7     | 17.8  | 9.7   | 135.6 |       | 42.8  |
| #9   | 259.3     | 8.2   | 13.5  | 52.3  |       | 43.5  |
| Mean | 239.7     | 18.3  | 12.7  | 80.0  | 96.8  | 28.6  |
| SEM  | 25.2      | 3.2   | 1.1   | 11.4  | 19.4  | 3.5   |

### 3,5-PIP2 dose-response for mutants shown in Figure 4F

[ $I/I_{\text{Max}}$  measured at -100 mV with various PI(3,5)P2 concentrations, where  $I_{\text{Max}}$  is the current at 100uM PI(3,5)P2 .]

#### TPC2 K203A

| PIP2(uM) | #1     | #2     | #3     | #4     | #5     | Mean   | SEM    |
|----------|--------|--------|--------|--------|--------|--------|--------|
| 1        | 0.0512 | 0.0273 | 0.0095 | 0.0415 | 0.0235 | 0.0306 | 0.0072 |
| 3        | 0.1025 | 0.0909 | 0.0238 | 0.0824 | 0.0588 | 0.0717 | 0.0140 |
| 10       | 0.2011 | 0.2727 | 0.4048 | 0.3201 | 0.2353 | 0.2868 | 0.0355 |
| 30       | 0.7829 | 0.9091 | 0.9048 | 0.7906 | 0.8235 | 0.8422 | 0.0273 |
| 100      | 1      | 1      | 1      | 1      | 1      | 1      | 0      |

#### TPC2 K204A

| PIP2(uM) | #1     | #2     | #3     | #4     | #5     | Mean   | SEM    |
|----------|--------|--------|--------|--------|--------|--------|--------|
| 1        | 0      | 0.025  | 0      | 0      | 0.1251 | 0.0300 | 0.0242 |
| 3        | 0      | 0.1054 | 0.0941 | 0.2222 | 0.2502 | 0.1344 | 0.0456 |
| 10       | 0.4211 | 0.3106 | 0.3824 | 0.4444 | 0.6254 | 0.4368 | 0.0523 |
| 30       | 0.9211 | 0.8959 | 0.9412 | 0.7778 | 0.8755 | 0.8823 | 0.0284 |
| 100      | 1      | 1      | 1      | 1      | 1      | 1      | 0      |

#### TPC2 K207A

| PIP2(uM) | #1     | #2     | #3     | #4     | #5     | Mean   | SEM    |
|----------|--------|--------|--------|--------|--------|--------|--------|
| 0.1      | 0      | 0      | 0      | 0      | 0      | 0      | 0      |
| 1        | 0.0632 | 0.0630 | 0.0719 | 0.0458 | 0.0743 | 0.0636 | 0.0050 |
| 3        | 0.3150 | 0.4590 | 0.2758 | 0.4730 | 0.2340 | 0.3514 | 0.0486 |
| 10       | 0.7895 | 0.8148 | 0.7994 | 0.9160 | 0.7921 | 0.8224 | 0.0238 |
| 30       | 0.9474 | 0.9630 | 0.9592 | 0.9924 | 0.9406 | 0.9605 | 0.0089 |
| 100      | 1      | 1      | 1      | 1      | 1      | 1      | 0      |

## 3,5-PIP2 dose-response for mutants shown in Figure 4F

[ $I/I_{\text{Max}}$  measured at -100 mV with various PI(3,5)P2 concentrations, where  $I_{\text{Max}}$  is the current at 100uM PI(3,5)P2 .]

### TPC2 S322A

| PIP2(uM) | #1     | #2     | #3     | #4     | #5     | #6     | Mean   | SEM    |
|----------|--------|--------|--------|--------|--------|--------|--------|--------|
| 0.1      | 0      | 0      | 0      | 0      | 0      | 0      | 0      | 0      |
| 1        | 0.0286 | 0.1429 | 0.1038 | 0.0593 | 0.0368 | 0.0968 | 0.0780 | 0.0180 |
| 3        | 0.2857 | 0.7810 | 0.6538 | 0.7407 | 0.4211 | 0.6452 | 0.5879 | 0.0790 |
| 10       | 0.8286 | 0.9143 | 0.8846 | 0.9259 | 0.8632 | 0.8065 | 0.8705 | 0.0192 |
| 30       | 0.9714 | 0.9524 | 0.9615 | 0.9630 | 0.9684 | 0.9677 | 0.9641 | 0.0028 |
| 100      | 1      | 1      | 1      | 1      | 1      | 1      | 1      | 0      |

### TPC2 R329A

| PIP2(uM) | #1     | #2     | #3     | #4     | #5     | Mean   | SEM    |
|----------|--------|--------|--------|--------|--------|--------|--------|
| 0.1      | 0      | 0      | 0      | 0      | 0      | 0      | 0      |
| 1        | 0.0444 | 0.0231 | 0.0352 | 0.0354 | 0.0565 | 0.0389 | 0.0055 |
| 3        | 0.1900 | 0.2800 | 0.2100 | 0.3500 | 0.1200 | 0.2300 | 0.0394 |
| 10       | 0.6222 | 0.7077 | 0.7042 | 0.7080 | 0.7609 | 0.7006 | 0.0223 |
| 30       | 0.8889 | 0.9385 | 0.9507 | 0.9292 | 0.9239 | 0.9262 | 0.0104 |
| 100      | 1      | 1      | 1      | 1      | 1      | 1      | 0      |
